# Supplementary material
Source: Springer Nature journal article supplement (https://www.springermedizin.de/resource/supplementary/12877_2005_53_MOESM1_ESM.pdf/9441102)
Supplement: MOESM1 [file 9441102]

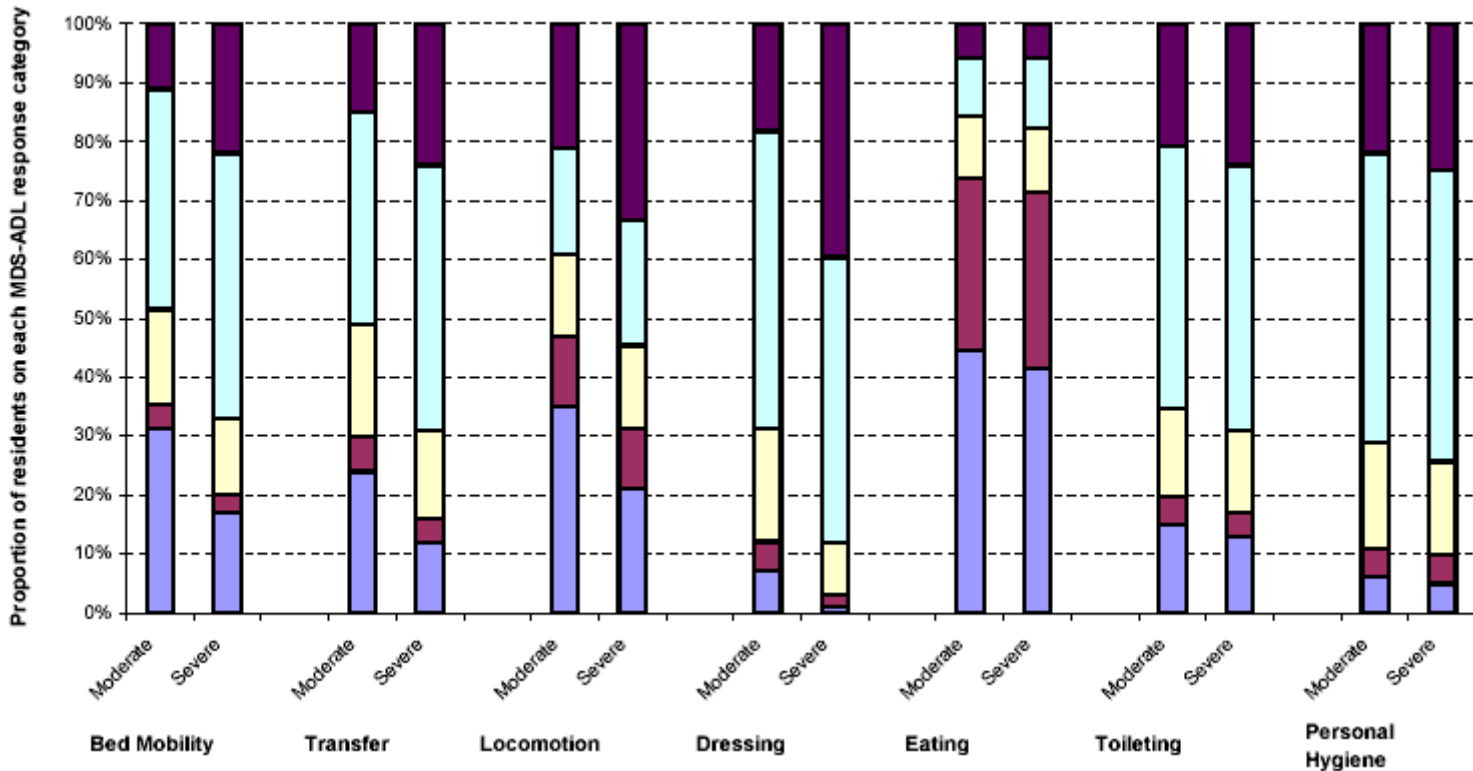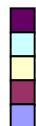

Total dependence  
 Extensive assistance by staff  
 Limited assistance by staff  
 Some supervision required  
 Independent
